# Supplementary material for: Quantifying ChIP-seq data: a spiking method providing an internal reference for sample-to-sample normalization
Source: HighWire-hosted journal article supplement (doi:10.1101/gr.168260.113), 2014-04-07
Supplement: Supplemental_Figure1.pdf [file Supplemental_Figure1.pdf]

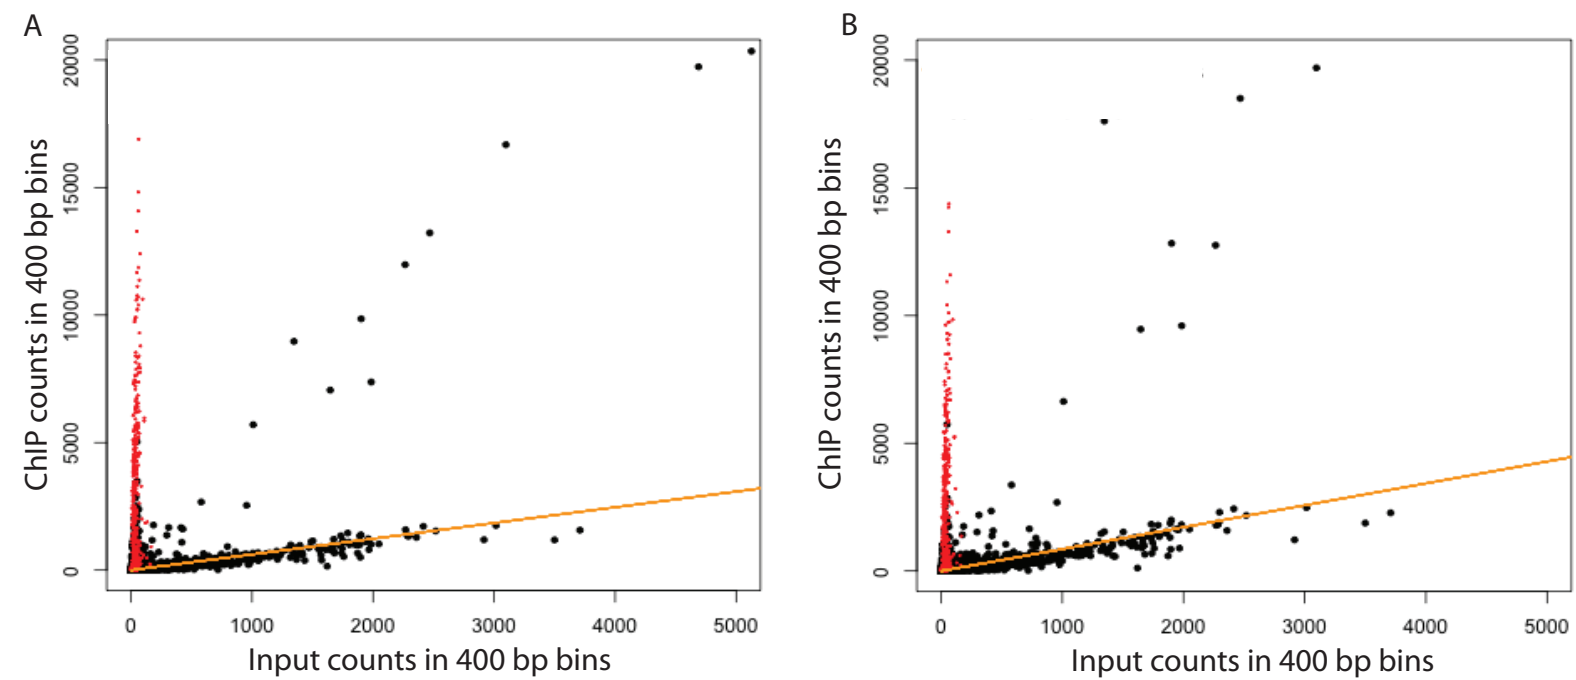

**Figure S1.** Scatter plots comparing the counts in 400 bp bins for the input 97.5 sample and either the 97.5\_S5 ChIP sample (panel A) or the 97.5\_S15 ChIP sample (panel B). Bins overlapping with pol III loci (see Table S3 in {Renaud, 2014 #45}) are shown in red. The robust linear regression line (excluding the bins corresponding to pol III loci) is shown in orange.
