# Supplementary material for: Quantifying ChIP-seq data: a spiking method providing an internal reference for sample-to-sample normalization
Source: HighWire-hosted journal article supplement (doi:10.1101/gr.168260.113), 2014-04-07
Supplement: Supplemental_Legend.docx [file Supplemental_Legend.docx]

**SUPPLEMENTARY FIGURE LEGEND**

**Figure S1**. Scatter plots comparing the counts in 400 bp bins for the input 97.5 sample and either the 97.5_S5 ChIP sample (panel A) or the 97.5_S15 ChiP sample (panel B). Bins overlapping with pol III loci (see Table S3 in ([Renaud et al. 2014](#_ENREF_27))) are shown in red. The robust linear regression line (excluding the bins overlapping with pol III loci) is shown in orange.
