# Supplementary material for: Quantifying ChIP-seq data: a spiking method providing an internal reference for sample-to-sample normalization
Source: HighWire-hosted journal article supplement (doi:10.1101/gr.168260.113), 2014-04-07
Supplement: Table_S1.xlsx [file Table_S1.xlsx]

## Sheet: Mouse Tag Counts
A	B	C	D	E	F	G	H	I	J	K
sample name	% mouse chromatin	total number of tags aligned onto the mouse genome NCBI37/mm9	total number of non-redundant aligned tags (%)	non-redundant and redundant tags counted up to a maximum of 50
				total number of tags	tags in mouse pol III loci	% tags in mouse pol III loci	ambiguous mouse/human tags	% ambiguous tags	ambiguous tags in mouse pol III loci	% ambiguous tags in mouse pol III loci
97.5_R1	97.5	177675882	129584866 (0.729)	177448204	261926	0.147607	261245	0.147	6325.75	2.42139
95_R1	95	162155797	111709679 (0.689)	161985625	335560	0.207154	242637	0.149	8755.09	3.60831
90_R1	90	169752208	89176477 (0.525)	169581004	321838	0.189784	256726	0.151	8604.92	3.35179
Input 97.5	97.5	156080538	126475813 (0.810)	155914207	16813.5	0.0107838	34112	0.0219	13	0.0381098
Input 95	95	170330335	145226421 (0.853)	170132654	19680.8	0.0115679	243610	0.143	91.625	0.0376113
Input 90	90	82204925	74519664 (0.907)	82133639	8971.83	0.0109235	120401	0.146	56.8851	0.0472463
97.5_R2	97.5	98276137	68335762 (0.695)	98189995	151637	0.154432	34746	0.0353	1211.01	3.48533
95_R2	95	128565255	88824358 (0.691)	128450488	261798	0.203812	46301	0.036	2343.03	5.06042
97.5_P1	97.5	151395554	98879842 (0.653)	151259178	32744.8	0.0216482	56650	0.0374	134.399	0.237244
97.5_S5	97.5	121398127	33557664 (0.276)	121178398	1.29349e+06	1.06742	158395	0.13	33506	21.1534
97.5_S10	97.5	116861610	35891632 (0.307)	116629066	974701	0.835727	137497	0.118	23208.6	16.8794
97.5_S15	97.5	147747904	55667012 (0.377)	147454910	1.07215e+06	0.727103	177933	0.12	30616.5	17.2067
Table S1A. Number of sequenced non-redundant and redundant tags for the samples indicated in column A. Column C shows total number of tags aligning onto the mouse genome excluding ambiguous tags but including all copies of of a read. Column D shows number of non-redundant tags only (tags sequenced several times were counted as 0). Column E shows non-redundant and redundant tags counted up to a ma…

## Sheet: Human Tag Counts
A	B	C	D	E	F	G	H	I	J	K
sample name	% mouse chromatin	total number of tags aligned onto the human genome GRCh37/hg19	total number of non-redundant aligned tags (%)	non-redundant and redundant tags counted up to a maximum of 50
				total number of tags	tags in human pol III loci	% tags in human pol III loci	ambiguous mouse/human tags	% ambiguous tags	ambiguous tags in human pol III loci	% ambiguous tags in human pol III loci
97.5_R1	97.5	1921119	1455161 (0.757)	1915710	7158.67	0.373682	257671	11.826	5059.36	1.9635
95_R1	95	3234925	2284279 (0.706)	3226549	18445.7	0.571686	238489	6.866	6534.1	2.73979
90_R1	90	4627053	2513391 (0.543)	4614059	30005.4	0.650304	256939	5.261	6780.67	2.63902
Input 97.5	97.5	558781	469673 (0.841)	554495	143.989	0.0259675	34003	5.736	13	0.0382319
Input 95	95	1400513	1238431 (0.884)	1388594	509.5	0.0366918	242575	14.763	145.81	0.060109
Input 90	90	1335296	1233268 (0.924)	1323513	439.333	0.0331945	120143	8.255	81.5977	0.0679171
97.5_R2	97.5	688342	474263 (0.689)	688342	3575.41	0.519423	34557	4.78	1071	3.09923
95_R2	95	1671747	1173623 (0.702)	1671747	12030.7	0.719648	45767	2.665	1950	4.26071
97.5_P1	97.5	1883641	1291770 (0.686)	1883635	808.325	0.042913	56264	2.9	130.436	0.231828
97.5_S5	97.5	7235712	2159649 (0.298)	7233976	56552.2	0.781758	140365	1.903	18265.4	13.0128
97.5_S10	97.5	4810244	1546947 (0.322)	4808806	42537	0.884564	126503	2.563	13554.7	10.7149
97.5_S15	97.5	7751899	3040014 (0.392)	7749689	79037.2	1.01988	163302	2.063	18394.5	11.2641
Table S1B. Number of sequenced non-redundant and redundant tags for the samples indicated in column A. Column C shows total number of tags aligning onto the human genome excluding ambiguous tags but including all copies of of a read. Column D shows number of non-redundant tags only (tags sequenced several times were counted as 0). Column E shows non-redundant and redundant tags counted up to a ma…
