# Supplementary material for: Quantifying ChIP-seq data: a spiking method providing an internal reference for sample-to-sample normalization
Source: HighWire-hosted journal article supplement (doi:10.1101/gr.168260.113), 2014-04-07
Supplement: Table_S2.xlsx [file Table_S2.xlsx]

## Sheet: Mouse Tag Counts
A	B	C	D	E	F	G
sample name	% mouse chromatin	total number of tags aligned onto the mouse genome NCBI37/mm9	total number of non-redundant aligned tags (%)	non-redundant and redundant tags counted up to a maximum of 50
				total number of tags	tags in mouse pol III loci or 1)around pol II TSS	% tags in mouse pol III loci or 1)around pol II TSS
mR1_WT	97.5	138140817	87673656 (0.635)	137964783	246301	0.178525
mR1_KO	97.5	102960563	79472600 (0.772)	102830412	352984	0.343268
mR2_WT	97.5	117386661	16660105 (0.142)	117219468	329831	0.281379
mR2_KO	97.5	93282401	29793406 (0.319)	92940677	1.0287e+06	1.10683
Input WT	97.5	171682439	105190204 (0.613)	171459568	28883.7	0.0168458
Input KO	97.5	153102861	99364087 (0.649)	152921316	23043	0.0150685
RPB2_95	95	135425335	22856986 (0.169)	135323780	1)8729231.877	1)6.451
RPB2_90	90	142197317	43246510 (0.304)	142078048	1)8978706.497	1)6.320
Input RPB2_95	95	166871711	143213657 (0.858)	166857539	731799	0.438577
Input RPB2_90	90	81453441	74053538 (0.909)	81433561	311470	0.382483
Table S2A. Number of sequenced non-redundant and redundant tags for the samples indicated in column A. Column C shows total number of tags aligning onto the mouse genome excluding ambiguous tags but including all copies of of a read. Column D shows number of non-redundant tags only (tags sequenced several times were counted as 0). Column E shows non-redundant and redundant tags counted up to a ma…

## Sheet: Human Tag Counts
A	B	C	D	E	F	G
sample name	% mouse chromatin	total number of tags aligned onto the human genome GRCh37/hg19	total number of non-redundant aligned tags (%)	non-redundant and redundant tags counted up to a maximum of 50
				total number of tags	tags in human pol III loci or 1)around pol II TSS	% tags in human pol III loci or 1)around pol II TSS
mR1_WT	97.5	8748086	6055434 (0.692)	8748086	19244.6	0.219986
mR1_KO	97.5	13724848	11344058 (0.857)	13724848	10972.1	0.0799436
mR2_WT	97.5	10220175	1748712 (0.171)	10220175	49569.9	0.48502
mR2_KO	97.5	9407979	3297892 (0.351)	9407827	48051.7	0.510763
Input WT	97.5	6920171	4641860 (0.671)	6920171	1808.64	0.0261358
Input KO	97.5	4720003	3359982 (0.712)	4720003	1132.48	0.0239932
RPB2_95	95	18039550	3421614 (0.190)	18038851	1)1648695.1	1)9.140
RPB2_90	90	32313731	11364479 (0.352)	32312886	1)3132781.3	1)9.695
Input RPB2_95	95	1391996	1234842 (0.887)	1391996	19208.4	1.37992
Input RPB2_90	90	1329118	1229644 (0.925)	1329058	15783.9	1.1876
Table S2B. Number of sequenced non-redundant and redundant tags for the samples indicated in column A. Column C shows total number of tags aligning onto the human genome excluding ambiguous tags but including all copies of of a read. Column D shows number of non-redundant tags only (tags sequenced several times were counted as 0). Column E shows non-redundant and redundant tags counted up to a ma…
